# Supplementary material for: Hypothermia protects against ventilator-induced lung injury by limiting IL-1β release and NETs formation
Source: eLife. 2025 Jun 24;14:RP101990. doi: 10.7554/eLife.101990 (PMC12187133; doi:10.7554/eLife.101990)
Supplement: Figure 1—source data 1. [file elife-101990-fig1-data1.xlsx]

## Sheet: Figure 1B
30 min	30 min	30 min	30 min	150 min	150 min	150 min	150 min
NS, LVV	LPS, LVV	NS, HVV	LPS, HVV	NS, LVV	LPS, LVV	NS, HVV	LPS, HVV
96	94	106	96	83	91	86	50
98	99	98	99	93	100	92	60
100	94	101	95	101	92	89	95
100	101	93	96	109	109	93	56
100	102	99	94	98	114	83	49
100	83	94	103	104	87	89	71
85	91	93	99	103	91	87	65
94		91	98	97		91	57
			93				70
			88				53
			89				50
			80				72

## Sheet: Figure 1C
Saline LVV	Saline HVV	LPS LVV	LPS HVV
1.6023	1.5738	3.1171	6.5676
2.8518	1.3184	5.808	5.3679
2.92	1.7901	6.4125	2.145
1.2688	1.1304	1.2122	5.076
0.28812	1.2012	2.8182	6.27
0.6895	3.664	3.4505	13.1922
0.2616	5.052	6.2244	3.3957
0.2968	3.3		2.9183
			4.2186
			9.9925
			13.0176
			5.529

## Sheet: Figure 1D
NS+LVV	LPS+LVV	NS+HVV	LPS+HVV
2.1364	1.2627	2.7084	0.58266
4.8694	2.97	4.1472	2.4273
4.8	1.4915	1.3728	0.4224
3.3794	2.0938	1.926	2.6602
3.8122	2.574	2.5844	2.96
1.6275	1.3333	2.328	3.5532
1.5576	2.9526	4.308	1.953
1.5848		6.744	3.3649
			3.7113
			5.6175
			4.1856
			2.1437

## Sheet: Figure E
NS+LVV	LPS+LVV	NS+HVV	LPS+HVV
0.25985	0.31172	0.20353	1.80648
0.19403	0.20443	0.33943	0.78047
0.20599	0.30604	0.39122	1.34731
0.14102	0.078	0.16312	0.5542
0.078	0.54048	0.2204	1.59319
0.29787	0.078	0.21108	1.60452
0.45729	0.42305	0.23906	0.66616
0.42671		0.24497	0.79392
			1.72197
			1.07414
			0.65229
			0.38629

## Sheet: Figure 1F
NS+LVV	LPS+LVV	NS+HVV	LPS+HVV
116.71	142.005	40.543	257.704
58.327	134.456	132.331	331.931
67.288	195.543	71.397	627.654
0	97.943	0	448.164
0	134.411	10.549	350.273
0	132.422	66.705	369.777
0	68.55	68.985	345.053
49.9		80.82	536.42

## Sheet: Figure 1G
Saline LVV	Saline HVV	LPS LVV	LPS HVV
0	59.66	0	274.31
0	17.9	0	205.23
0	120.12	0	351.55
0	0	0	217.7
0	25.3	0	163.13
0	59.03	0	142.77
0	49.56	0	108.23
0		0

## Sheet: Figure 1H
Saline LVV	LPS LVV	Saline HVV	LPS HVV
0.334636	4.79287	0.187544	2.74207
0.239296	3.60901	0.17401	6.69636
0	5.54746	0.575642	2.50582
0.221812	0.189955	0.130154	8.16781
0.140238	4.91629	0.105038	7.09582
0.317008	5.88848	0.153262	7.92954
0.16119	3.67652	0	6.18291
0.235018		0.082846	3.70285

## Sheet: Figure 1I
LVV+NS	LVV+LPS	HVV+NS	HVV+LPS
6.84115	14.6183	3.51146	56.9719
5.08829	6.58158	5.81137	52.8038
0.78132	19.2169	2.57162	38.0043
1.57528	8.15474	2.48471	36.0747
0.84565	16.964	5.39516	35.2546
1.78999	13.7342	5.23438	36.3152
	17.5439

## Sheet: Figure 1J
NS+LVV	LPS+LVV	NS+HVV	LPS+HVV
0.1933	3.0996	0.37089	0.41833
0.33666	0.38945	0.46504	4.51647
0.20698	1.09614	0.38397	2.56055
0.23892	0.47315	0.20606	3.6713
0.14715	0.8308	0.18078	2.65554
0.1897	0.50719	0.29117	5.73566
	0.54069	0.25829	2.85281
		0.14465	2.78324

## Sheet: Figure 1K
Saline LVV	Saline HVV	LPS LVV	LPS HVV
0.367	1.529	0.693	3.06
0.294	0.147	0.272	2.906
0.142	2.231	0.041	2.956
0.365	0.055	0.054	2.982
0.069	0.874	0.298	3.149
0.503	1.342	0.418	2.988
	0.017	0.319	3.168
	0.039

[truncated: 11 more sheets: Figure 1L, Supplemental 1B, Supplemental 1C, Supplemental 1D, Supplemental 1E, Supplemental 1F, Supplemental 1G, Supplemental 1H, Supplemental 1I, Supplemental 1J, Supplemental 1K]
