# Supplementary material for: Hypothermia protects against ventilator-induced lung injury by limiting IL-1β release and NETs formation
Source: eLife. 2025 Jun 24;14:RP101990. doi: 10.7554/eLife.101990 (PMC12187133; doi:10.7554/eLife.101990)
Supplement: Figure 2—source data 1. [file elife-101990-fig2-data1.xlsx]

## Sheet: Figure 2B
30 min	30 min	150 min	150 min
IgG	αLy6G	IgG	αLy6G
98	88	52	80
89	98	70	88
92	88	66	88
99	91	39	95
97	90	48	96
	89		87
	91		91
	91		86
	91		80
	88

## Sheet: Figure 2C
IgG	αLy6G
5.1	1.7
7.9	1.8
7	1.7
8.4	0.8
7	2.7
7.2	2.7
2	1.4
5.1	2.7

## Sheet: Figure 2D
IgG	αLy6G
3.5598	0.3384
5.4747	0.05423
4.557	0.0608
3.7044	0.12123
2.674	0.06129
1.6128	0.0126
0.926	0.13284
2.5806

## Sheet: Figure 2E
IgG	αLy6G
1.122	1.3752
1.8249	1.6286
2.205	0.7056
4.158	2.5326
1.015	2.5515
2.4552	1.274
0.53	2.1465
0.5457

## Sheet: Figure 2F
IgG	αLy6G
1.82838	0.3237
1.18339	0.262611
1.43691	0.330176
2.1469	0.388499
2.08223	0.211017
1.34018	0.216604
0.45128	0.259905
1.98871	0.725833

## Sheet: Figure 2G
IgG	αLy6G
108	112
174	85
146	88
189	198
324.678	123
257.754	212
382.205	295
269.934	407

## Sheet: Figure 2H
IgG	αLy6G
6.111	5.072
5.763	5.293
6.107	4.525
6.187	5.389
5.546	5.043
5.12	4.643
5.396	4.843
4.958	5.399

## Sheet: Figure 2I
IgG	αLy6G
2.222	2.398
1.36	1.868
2.122	2.814
1.738	3.524
2.526	2.288
1.264	1.69
2.24	1.022
1.408	3

## Sheet: Figure 2J
IgG	αLy6G
4.61189	10.5392
3.20426	5.64519
3.57937	7.13092
1.94004	16.0173
5.46846	10.0718
5.68824	8.45599
8.21329	5.9561
3.59028	15.3003

## Sheet: Figure 2K
IgG	αLy6G
59.905	22.48
46.36	3.485
61.615	4.385
60.07	12.18
80.49	10.455
61.06	11.745
54.16	3.53
30.19	8.82
50.97	4.24
55.04	12.84

[truncated: 3 more sheets: Figure 2L, Figure 2M, Figure 2N]
