# Supplementary material for: Hypothermia protects against ventilator-induced lung injury by limiting IL-1β release and NETs formation
Source: eLife. 2025 Jun 24;14:RP101990. doi: 10.7554/eLife.101990 (PMC12187133; doi:10.7554/eLife.101990)
Supplement: Figure 3—source data 1. [file elife-101990-fig3-data1.xlsx]

## Sheet: Figure 3B
30 min	30 min	150 min	150 min
Padi4fl/fl	Padi4fl/fl S100a8Cre	Padi4fl/fl	Padi4fl/fl S100a8Cre
100	97	75	65
95	109	62	75
95	95	76	59
95	96	54	85
83	90	56	79
82	94	62	83
87	100	65	95

## Sheet: Figure 3C
Padi4fl/fl	Padi4fl/fl S100a8Cre
24.9	19.3
42.7	24
15.9	39.8
14.7	10.3
8.86	15.2
15.7	20.9
19.1	13.6

## Sheet: Figure 3D
Padi4fl/fl	Padi4fl/fl S100a8Cre
1.09365	0.49116
2.1583	0.596
2.1165	1.6782
0.94628	0.33334
1.28535	0.33152
0.89058	1.00454
0.946405	0.37208

## Sheet: Figure 3E
Padi4fl/fl	Padi4fl/fl S100a8Cre
134.263	97.371
91.838	177.303
114.063	168.498
141.664	126.835
243.74	267.928
128.131	84.047
178.696	237.447

## Sheet: Figure 3F
Padi4fl/fl	Padi4fl/fl S100a8Cre
0.886	0.866
1.122	0.826
0.865	0.844
0.839	0.848
0.902	0.869
1.355	0.808
1.0245	0.83

## Sheet: Figure 3H
30 min	30 min	150 min	150 min
Vehicle	DNase I	Vehicle	DNase I
86	107	83	85
101	99	74	84
85	95	65	80
88	89	75	78
95	87	74	88
84	85	56	90
104	89	66	87
	85		77

## Sheet: Figure 3I
Vehicle	DNase I
18.5	11.2
11	15.1
24.4	21.2
15.1	36.1
22.7	29.3
22.6	34.2
22.4	18.8
	21.6

## Sheet: Figure 3J
Vehicle	DNase I
0.5407	0.4217
1.23328	0.53556
3.54107	0.34798
0.66427	0.81757
1.8208	0.4387
0.91676	0.40268
0.80612	0.62951
	0.41953

## Sheet: Figure 3K
Vehicle	DNase I
292.396	238.856
589.582	210.632
189.712	331.327
245.817	261.021
229.026	330.385
201.457	212.574
	148.813

## Sheet: Figure 3L
Vehicle	DNase I
0.956	0.265
0.205	0.176
0.506	0
0.074	0
0.557	0
0.173	0
0.089	0
0.199	0
0.237	0
0.589	0
0.369

[truncated: 8 more sheets: Supplement 1B, Supplement 1C, Supplement 1D, Supplement 1E, Supplement 1G, Supplement 1H, Supplement 1I, Supplement 1J]
