# Supplementary material for: Hypothermia protects against ventilator-induced lung injury by limiting IL-1β release and NETs formation
Source: eLife. 2025 Jun 24;14:RP101990. doi: 10.7554/eLife.101990 (PMC12187133; doi:10.7554/eLife.101990)
Supplement: Figure 4—source data 1. [file elife-101990-fig4-data1.xlsx]

## Sheet: Figure 4B
30 min	30 min	150 min	150 min
WT	Il1r1-/-	WT	Il1r1-/-
92	95	69	102
89	83	78	96
93	90	43	91
95	89	79	92
101	106	51	90
95	103	48	98
94	98	54	88
91	110	45	97
	108		95

## Sheet: Figure 4C
WT	Il1r1-/-
8.0648	10.3582
11.1081	16.224
5.2644	5.23
3.288	7.3968
31.9332	25.3053
10.5677	13.2496
10.701	5.1348
18.404

## Sheet: Figure 4D
WT	Il1r1-/-
3.2096	1.7554
4.4835	3.144
1.189	2.3
6.144	3.8592
2.69492	2.43567
3.4606	4.1912
1.2546	1.452
2.461

## Sheet: Figure 4E
WT	Il1r1-/-
1.93339	0.63655
0.90909	0.35798
1.23126	0.22371
0.87028	0.20647
1.38625	0.58034
1.05826	0.48722
0.55586	0.67835

## Sheet: Figure 4F
WT	Il1r1-/-
174.394	281.49
352.337	212.052
231.126	208.195
237.635	168.639
64.996	141.689
121.934	180.491
114.274	147.841

## Sheet: Figure 4G
WT	Il1r1-/-
5.761	5.78
5.401	5.022
4.913	4.878
5.897	4.914
12.3874	4.665
11.6505	4.846
11.0471	5.574
10.344	1.448

## Sheet: Figure 4H
WT	Il1r1-/-
1.478	3.1
1.908	2.598
2.248	3.1
1.684	2.088
2.2121	2.172
4.44857	2.128
4.62006	1.888
3.54988

## Sheet: Figure 4I
WT	Il1r1-/-
7.01237	9.41246
5.42573	7.2671
7.85255	6.67314
8.7029	5.50367
5.49099	6.78243
6.23879	7.95449
6.19777	5.73222
5.52647

## Sheet: Figure 4J
WT	Il1r1-/-
44.6214	21.9536
64.4068	27.3169
29.0072	20.347
34.1808	37.7445
45.7342	26.4269
21.2854	23.9569
25.6847	22.9605
41.9934	19.222
30.3814	16.0905
32.8356
33.6807

## Sheet: Figure 4K
WT	Il1r1-/-
3.2106	1.53255
2.83686	1.42378
1.09762	0.72093
2.89882	1.15899
2.94112	1.73507
1.56402	1.26293
3.17072	1.46732
1.56132	1.08133
5.02612	1.89239
1.26448	2.67897
1.15145
2.05747

[truncated: 7 more sheets: Figure 4L, Figure 4M, Supplement 1D, Supplement 1E, Supplement 2C, Supplement 2D, Supplement 2E]
