# Supplementary material for: Hypothermia protects against ventilator-induced lung injury by limiting IL-1β release and NETs formation
Source: eLife. 2025 Jun 24;14:RP101990. doi: 10.7554/eLife.101990 (PMC12187133; doi:10.7554/eLife.101990)
Supplement: Figure 5—source data 1. [file elife-101990-fig5-data1.xlsx]

## Sheet: Figure 5B
LOG10	ION (nM)			LPS (ng/mL)			IL-1β (ng/mL)
-0.522879							3.59712	3.52113	3.46535
0							5.46448	2.27273	4.16667
0.477121							7.23982	1.63934	5.64972
1	4.03727	4.66102	3.97351				10.0529	3.16456	1.90476
1.47712	2.65957	5.17241	9.52381	3.14136	5.46448	4.86486	4.54545	0.497512	5.08475
2	6	6.84211	2.04082	2.77778	3.63636	2.5	2.87356	3.125	6.74847
2.47712	5.22088	4.25532	8.39695	6.57895	2.05479	3.40136	2.95858	6.45161	5.42169
3	5.7971	7.33945	9.33333	2.87081	5.02513	2.22222	2.76498	5.35714	2.97619
3.47712	5.04202	8.87097	2.31214	2.94118	2.61438	2.23881
4	66.5	54.9815	55.7432	3.62319	3.26797	1.2987
4.47712	75.5556	86.4865	84.9765	3.87597	1.875	2.44755
5	98.2759	97.7477	97.1154	3.125	4.60526	1.06383

## Sheet: Figure 5C
Medium	LPS	IL-1b	Medium	LPS	IL-1b
Medium			ION 10 uM
5.47945	7.23684	10.8434	36.8984	35.8333	61.745
0.75188	5.78947	5.12821	50.8591	36.0759	59.919
5.06912	6.13208	3.9548	39.8876	33.3333	58.4906
3.29341	9.88593	4.81928	32.3718	43.3447	53.629
2.46154	6.83761	6.76692	38.0952	52.7473	63.3634
1.80505	3.22581	7.42358	50.7353	44	60.8824

## Sheet: Figure 5E
LOG10	ION (nM)			LPS (ng/mL)			IL-1β (ng/mL)
-1
-0.522879							8.20513	10.5085	5.69106
0							4.4843	9.41176	7.75194
0.477121							14.8148	5.39419	14.3198
1	5.15021	5.02283	4.83871				8.93855	5.97015	9.56522
1.47712	3.63636	6.59898	2.4735	1.94805	4.84848	3.16901	12.0275	10.0962	8.13397
2	3.95257	1.8797	4.88432	4.51389	1.89394	1.85185	7.90514	8.19113	2.7668
2.47712	5.08475	8.64553	5.26316	4.32692	3.30579	5.55556	10.2041	8.35655	5.51724
3	10.3825	13.2353	11.413	4.83871	1.4652	3.61991	7.22022	13.1313	8.47458
3.47712	38.0597	33.1034	38.1625	3.52113	5.01567	5.43478
4	98.8971	98.9967	97.1591	2	6.36042	4.23077
4.47712	99.3103	98.75	99.5984	3.73832	4.72103	4.09091
5	100	100	100	4.62633	2.43902	6.0241

## Sheet: Figure 5F
Medium	LPS	IL-1b	Medium	LPS	IL-1b
Medium			ION 3 uM
3.2491	6.46766	6.59898	45.0172	47.4903	68.231
5.74324	2.88462	7.54717	38.9381	53.7445	69.3548
5.28846	2.18579	5.38117	47.9339	52.0492	62.7273
6.25	3.53535	6.35838	51.1236	67.7419	67.9487
7.29167	8.17308	7.6087	56.6038	72.028	69.6203
8.96226	3.08642	3.82775	65.019	67.8715	71.3636
