# Supplementary material for: Hypothermia protects against ventilator-induced lung injury by limiting IL-1β release and NETs formation
Source: eLife. 2025 Jun 24;14:RP101990. doi: 10.7554/eLife.101990 (PMC12187133; doi:10.7554/eLife.101990)
Supplement: Figure 6—source data 1. [file elife-101990-fig6-data1.xlsx]

## Sheet: Figure 6B
Time	Normothermia										Hypothermia
-120	36.8	37.1	36.9	37.4	36.5	36.6	37.3	36.8	37.1	36.7	36.8	36.8	37.2	36.8	37.4	37	36.9	37	36.8	37.1
-60	36.5	36.9	36.8	36.9	36.8	36.8	36.9	36.6	36.5	36.7	36.9	36.5	36.9	37.6	36.8	37.2	37.1	37.2	36.7	36.8
0	36.6	36.5	36.4	36.3	36.2	36.3	36.6	36.3	36	36.2	36.5	36.6	36.5	36.8	36.3	37	36.2	36.8	36.6	36.5
30	36.6	36.7	37	36.8	37	36.9	36.7	36.5	36.6	36.9	31.3	31.2	31.8	31.9	32.4	32.6	31.5	31.2	31.6	32
60	37.2	37	37.2	36.8	37	37.3	36.9	36.9	37.5	37.4	32.1	31.8	31.8	32	32.1	32.2	31.6	31.9	32.1	32.1
90	37.4	37.2	37.2	37.3	37.3	37.6	37.5	37.3	37.5	37.4	32.4	31.9	31.9	31.6	32	32.3	32	32.2	32	32.3
120	37.4	37.3	37.4	37.1	37.2	37.3	37.4	37.3	37.5	37.6	32	31.8	32	32	32.3	32.4	32.2	32.6	32.3	32.8
150	37.4	37.1	37.2	37.2	37.3	37.4	37.3	37.2	37.5	37.6	32.3	32.4	32.2	32	32.1	32.2	32.1	32.2	32	32.4

## Sheet: Figure 6C
30 min	150 min	30 min	150 min
Normothermia	Normothermia	Hypothermia	Hypothermia
100	55	143	122
102	52	148	134
102	53	141	141
96	64	137	133
93	60	142	134
95	62	129	135
88	62	144	134
95	72	141	142
97	64	141	137
93	68	140	138

## Sheet: Figure 6D
Normothermia	Hypothermia
9.01	2.64
5.01	7.14
3.9	4.47
11.3	5.8
7.74	9.92
7.85	14.5
7.99	4.76
7.92	4.48
5.88	3.03
7.54	2.06

## Sheet: Figure 6E
Normothermia	Hypothermia
1.45	2.76
1.92	8.13
0.973	0.943
6.48	1.08
1.44	1.56
2.18	4.2
1.78	2.22
1.17	1.42
1.82	1.11
0.991	1.26

## Sheet: Figure 6F
Normothermia	Hypothermia
2.19278	0.274
1.44389	0.31842
2.91691	0.2963
1.88395	0.29924
1.20148	0.32044
0.80768	0.19078

## Sheet: Figure 6G
Normothermia	Hypothermia
151.641	90.981
124.668	63.564
356.559	197.519
150.847	102.27
140.063	189.668
205.94	120.065
214.415	302.792
176.057	118.649
306.956	137.131
148.929	78.507
362.463	75.265
129.459	85.165

## Sheet: Figure 6H
Normothermia	Hypothermia
7.60197	2.488
7.06388	3.12793
7.31063	2.3641
7.27994	1.83968
7.00235	2.14577
6.7935	1.75217
5.15309	2.1252
4.45364	1.97442
5.21956	2.8525
4.37229	1.84201

## Sheet: Figure 6I
Normothermia	Hypothermia
1.7908	2.08549
0.93289	1.75805
1.67155	2.15638
1.46367	1.99769
1.75725	2.1753
1.66888	2.17342
1.8794	2.34896
1.83778	2.19788
2.03828	1.97395
1.87664	1.66856

## Sheet: Figure 6J
Normothermia	Hypothermia
58.465	38.755
61.675	13.87
42.4	16.42
37.8	14.6
35.445	35.61
38.465	19.37
51.665	28.54
37.265	28.23
54.685	35.625
38.7	33.72

## Sheet: Figure 6K
Normothermia	Hypothermia
7.365	1.665
5.33	0
2.97	0
2.325	0
1.935	0.9
1.565	0.495
6.9	0.59
2.64	0.865
5.055	2.205
2.25	1.035

[truncated: 5 more sheets: Figure 6L, Figure 6M, Figure 6N, Supplement 1A, Supplement 1B]
