# Supplementary material for: Hypothermia protects against ventilator-induced lung injury by limiting IL-1β release and NETs formation
Source: eLife. 2025 Jun 24;14:RP101990. doi: 10.7554/eLife.101990 (PMC12187133; doi:10.7554/eLife.101990)
Supplement: Figure 7—source data 3. [file elife-101990-fig7-data3.xlsx]

## Sheet: Figure 7B
37℃	32℃	37℃	32℃	37℃	32℃
LPS		LPS+ATP		LPS+NIG
0.018265	0.03085	1.73909	0.931945	6.32113	1.76268
0.01143	0.09455	1.70772	0.690525	6.0702	2.10861
0.05245	0.010001	2.26271	0.931865	4.80157	2.03477
0	0	2.364	1.359	3.783	2.58
0	0.014	2.439	1.476	3.324	2.235
0	0	3.036	1.611	3.366	1.611

## Sheet: Figure 7C
37℃	32℃	37℃	32℃	37℃	32℃
LPS		LPS+ATP		LPS+NIG
1.3986	3.53982	22.6415	9.00901	59.0909	50.6667
7.69231	4.12371	25.1701	7.40741	45.8333	50
8.46154	5.7554	6.66667	14.7541	41.1765	42.6829
3.9604	3.4188	17.3653	22.6415	41.1765	54.4118
10.5263	4.13223	28.6325	5.76923	28.5714	35.5556
7.24638	1.65289	13.2184	11.3924	34.6154	23.3333

## Sheet: Figure 7G
37℃	32℃	37℃	32℃	37℃	32℃
LPS		LPS+ATP		LPS+NIG
0.105117	0.526687	0.778675	0.048374	5.22719	0.638907
0.115954	0.32235	1.22747	0.061218	3.76321	0.769058
0.074968	0.214067	2.23201	0.300726	3.42456	0.417309
0.120488	0.388925	2.9864	0.721058	3.47656	0.537277
0.052965	0.378443	3.58367	0.803235	1.61754	0.752427
0.138272	0.221273	4.67055	0.646588	3.19219	0.59632

## Sheet: Supplement 7
37℃	32℃	37℃	32℃	37℃	32℃	37℃	32℃
Atg16l1fl/fl		Atg16l1fl/fl Lyz2Cre		Atg16l1fl/fl		Atg16l1fl/fl Lyz2Cre
LPS				LPS + NIG
0	0	0	0	3.15	0.7425	3.29	0.75
0	0	0	0	2.2225	0.6075	3.4425	0.735
0	0	0	0.0925	1.4925	0.3225	5.7875	0.87
0	0.0225	0	0.07		0.3

## Sheet: Supplement 8B
37℃	37℃	32℃	32℃
Medium	ION	Medium	ION
3.35366	47.4627	0.478469	27.2277
4.38247	47.6596	2.91667	23.7624
6.74603	53.481	2.53807	30.3502
2.29358	52.5478	7.69231	38.2353
7.5	48.7465	6.19048	37.9913
4.80769	44.4795	2.63158	34.9398

## Sheet: Supplement 8C
37℃	37℃	32℃	32℃
Medium	ION	Medium	ION
9.81013	50.9579	6.21622	37.3178
8.64198	58.2222	8.88889	31.0526
9.83607	37.3288	5.66667	30.7971
4.2328	43.2099	3.89105	23.7237
7.71605	44.5783	2.30769	14.8515
6.11511	33.7143	5.28302	21.8623
